# Supplementary material
Source: Springer Nature journal article supplement (https://www.springermedizin.de/resource/supplementary/12883_2013_1050_MOESM3_ESM.pdf/9456424)
Supplement: MOESM3 [file 9456424]

Supplemental table 3. proportional ordinal logistic regression for the grades of CMBs using estimated GFR based on creatinine and cystatin C

| Variables                                                | unadjusted | 95% CI    | <i>p</i> | adjusted | 95% CI    | <i>p</i> |
|----------------------------------------------------------|------------|-----------|----------|----------|-----------|----------|
|                                                          | OR         |           |          | OR       |           |          |
| Estimated GFR based on creatinine and cystatin C, per SD | 1.29       | 1.01-1.17 | <0.01    | 1.25     | 1.02-1.15 | 0.03     |
| Estimated GFR based on cystatin C alone, per SD          | 1.33       | 1.04-1.21 | <0.01    | 1.28     | 1.02-1.12 | 0.03     |
| Estimated GFR based on creatinine alone, per SD          | 1.23       | 0.95-1.10 | 0.46     | 1.22     | 0.94-1.09 | 0.80     |

\* GFR: glomerular filtration rate, SD: standard deviation

†adjusted for covariates; age, sex, total cholesterol, diabetes, hypertension, dyslipidemia, previous heart disease, smoking,

previous anti thrombotic or anticoagulant use, and white matter lesions
